# Supplementary material for: Mentalizing and Information Propagation through Social Network: Evidence from a Resting-State-fMRI Study
Source: Front Psychol. 2016 Nov 4;7:1716. doi: 10.3389/fpsyg.2016.01716 (PMC5095504; doi:10.3389/fpsyg.2016.01716)
Supplement: Supplementary file 1 [file Data_Sheet_1.xlsx]

## Sheet: Positive
Pos		Chinese Version	English Version
1	1	72岁的朱敏才曾任中国驻尼泊尔大使馆经济商务参赞，妻子孙丽娜是北京最早一批小学英语老师。2005年退休后，夫妇俩来到贵州山区支教，相继为6所山村小学义务开设英语课，至今已9年。他们的足迹遍及望谟、尖山苗寨等地，朱老师说，“我们不撤退，等到最后实在爬不起来的时候再不干了”。	Mr. Zhu, who used to be an officer of Chinese Embassy in Nepal. His wife is a retired English teacher. After retirement, they came to the remote countries in Guizhou Province. They have taught the students in primary schools as volunteers for nine years. Mr. Zhu said: "we won't retrieve until we can't work any longer."
2	2	距高考还有两个月，合肥一中国际班的高三学生却早被国外名校录取了。一个班里，从去年11月份递交申请至今年4月初，55名学生收到130份国外名校通知书，大多手握3个以上名校通知书，最多的手握6份。不用奋战题海，他们现在的生活是与外教互动、听音乐、排练话剧。	Different from other students who are prepared for the upcoming entrance exam for university, the 55 students in one class in No. 1 middle school in Hefei have received 130 offers from famous universities abroad. Most of them have received 3 offers and the most talented student received 6 offers. They don't struggle with exam questions, but interact with foreign teachers, listen music and play op…
3	3	四川邛崃人李勇因为一次意外，高位截瘫。大哥工作太忙，没时间照顾弟弟。与大哥离婚多年的前大嫂周小华毫无怨言地担负起照顾他的重任，并将生活下去的信心带给了他，至今已近三年。今年3月，李勇和残疾人朋友创办邛崃市残疾人公益促进会，想通过自己的努力，帮助更多人。	Li Yong suffers from severe paraplegia and is not capable of looking after himself. His ex-sister-in-law, Zhou Xiaohua took this responsibility and encouraged him to live. Now, Li Yong establish a foundation for disabled people. He hopes he can help other unfortunate people with his own effort.
4	4	郑州大学大四生汪越，最疯狂时连打网游七八个小时，被称“DOTA大神”。离考研还有100天时，他觉得自己该努力了，此后平均每天学习近14小时，“爆发小宇宙”，最终超国家线111分，复试第一，最终考上湖大研究生。只要沉下心来并且坚持、调整心态，每个人都是潜力股。	Wang Yue, a senior student in Zhengzhou University, was indulged in online game. But he realized this would harm this study, so he give up gaming and put all his effort back to study. He studied over 14 hours each day. Finally, he passed the entrance exam of postgraduate and became a postgraduate student in Hunan University.
5	5	1975年国家决定出版160种中外语文词典，其中《普什图语汉语词典》的编写工作交给了中国传媒大学教授车洪才。他伏案36年，今年将词典交付时，出版社都忘了国家有这项工作。他说，“我不求名、不求利，到现在没拿到一分钱，完全是自己花精力在搞这个东西，这是国家给我的任务，我现在来交稿。”	Professor Che Honcai had worked for compiling the Pashto-Chinese dictionary for 36 years. When he finished and send it to the press, no one can remember this project. Professor Che said: "this is the task given by our country, so I tried my best to finish it."
6	6	美国一普通农妇，76岁时因关节炎放弃农活开始绘画。80岁到纽约办画展，引起轰动。101岁辞世，开过15次个人画展，留下1600幅作品，是美国著名和最多产的原始派画家之一。“做你喜欢做的事，上帝会高兴地帮你打开成功之门，哪怕你现在已经80岁了。”	An American old lady retired at the age of 76 because she suffered from arthritis. But she began to draw and set up her own art exhibition at the age of 80. Before she died at the age of 101, she had 15 personal art exhibitions, and 1,500 pictures. She has been one of the most famous and productive primitive artists in US. "Do what you like, thus God will help you, although you are 80 years old."
7	7	在北京环球金融中心，24岁的北大研究生张天一开了家牛肉粉店，生意火爆。和他一起创业的小伙伴有硕士、MBA，还有前公务员。开店前，他回常德吃遍了百余家米粉店，最后拜师学艺，确定配方。“我们是90后，为自己上班。用良知，在他乡，还原家乡的味道。”	Zhang Tianyi, a postgraduate student in Peking University, build up a restaurant selling beef rice noodle. His partners are former officer and MBA. Before launching this project, he had visited more than 100 restaurants and learned. He hoped they can display the favor of hometown with their efforts.
8	8	一碗青菜，一碗饭，一日三餐年年如此。福建连江琯头街社区87岁的老人柳秀芳，日花销不超10元，“抠门”得连瓶矿泉水都不愿买，却把子女从国外寄回的生活费、寿礼钱攒给公益事业。20多年来，她累计捐资超过400万，正是因为她的善举，近千名寒门学子得以重返校园。	Liu Xiufang, an old lady who lived in Lianjiang, Fujian, saved most of her money to contribute to help others. She has donated RMB over 4 million yuan and help nearly one thousand poor students continue to study.
9	9	发传单、摆地摊、做家教、做脚模……温州大学女生李健琳不仅承担了自己所有的学费和生活费，还攒下2万多元，带爱旅游但没出过国的妈妈圆出国梦。36天，母女俩玩转东南亚10个城市，总共花费1.5万余元。如今，完成心愿的李健琳开了家窗帘饰品店，开始创业。	Li Lin, a female student in Wenzhou University, earn RMB over 20 thousand yuan through her hard working. She used this money to take her mother travelling abroad. They visited 10 cities in Eastsouth Asia. Now, she has opened her own decoration shop.
10	10	湖南衡阳77岁老人欧商25年来坚持自学，参加了70多门课程的100多场考试。至今已获湘潭大学法律、律师、行政管理和行政法4专业自考本科文凭。4月14日下午，欧老与湘潭大学的指导老师通话后得知，他的秘书学专业本科论文答辩被评为“良”，顺利通过，不久他将会获得第5个文凭。	Ou Shang, an old man in Hunan Province, have studied by himself for 25 years. He has learned over 70 coursed and participate in over 100 exams. He has obtain the diplomas for law, lawyer, administration and administrative law. He recently obtained his fifth diploma for secretary.
11	11	3月，在全球顶级信息安全赛事Pwn2Own现场，来自上海的Keen团队，仅15秒就攻破最新的苹果操作系统MacOS X，成为现场唯一的成功者。据悉，该团队“二分之一是各地的历年高考状元，二分之一是数学专业......”。在去年11月的比赛中，Keen用30秒攻破苹果手机iOS 7.0.3系统，成为中国在信息安全领域的首个世界冠军。	One of the highest level competition in network security Pwn2Own was held in March. The Group Keen, from Shanghai, overwhelmed the firewall of MacOS within 15 seconds. They are the only one group with success. Half of the group members are top students in the entrance exam for university. Half of the group members major in Math. In the competition last year, Keen overwhelmed the iOS system within…
12	12	2012年，湖南男孩丁浩洋放弃高考，回家自学。这一年他“孤独奋斗”，给自己制定了时间表，和高中课堂无差，保持45分钟一节课，休息10分钟的节奏。今年2月，他收到包括伊利诺伊大学香槟分校在内的5所美国名校录取通知。他说，“想去接触更大的世界，根本不敢偷懒。”	A boy in Hunan Province, Ding Haoyang gave up his entrance exam in 2012. He studied by himself. He set a busy schedule, consisting of many 45 mins classes and 10 mins rest between classes. He received the offers from University of Illinois at Urbana-Champaign and other four famous universities in US. He said, "because I want to go to a wider world, I can't be lazy".
13	13	河南78岁的程安仁，被称作孤胆船工。他见人落水必定施救，13岁开始下水救人到65岁，52年里总计救出27名落水者，故事“到天亮也讲不完”。如今年迈的他走路不再利索，双腿因救人留下多处伤口。 他说，“我不图什么，不管谁有困难，咱们都要帮一把。”	An old boatman, Cheng Anren is now 78 years old and very brave. Every time he sees someone falling down to the river, he always rescues him/ her. He has rescued 27 persons in the past 52 years. There are much experience on him. His legs were wounded after the long-lasting rescue. He said: "whoever has difficulty, I will help."
14	14	一身防火服，一张略显稚嫩的侧脸，肩上扛个吐着一米长火舌的液化气罐，奋力飞奔。这位勇敢的消防员是武汉市公安消防支队徐东路中队消防员皇甫江武。2014年1月3日，武昌区铁机路一家茶餐厅发生火灾，起火源为3个正在冒火的煤气罐。紧急关头，他抱起着火的煤气罐冲出火场。	A brave fireman in Wuhan, Huangfu Jiangwu, lifted the burning gas tank out of the restaurant that was in fire in Jan. 3th, 2014.
15	15	同寝4名本科生全部直博，这在华中科技大学还是第一次。工程力学祝经明、郭松，黄鲜荣、肖琳四人大二时，就明确了成为“直博生”的志愿，并两两结为学习伙伴。他们查阅关于学校“直博”的资料，主动联系导师，通过邮件、面谈的方式，向导师表明自己的科研实力和兴趣，最终获得了垂青。	It is the first time in Huazhong University of Science and Technology that all four students in a dormitory room received their PhD offers. All of them has decided to apply for PhD when they were sophomores. They helped to study each other. They contacted supervisors with e-mails and face-to-face communication and demonstrated their talent in research. They all succeeded.
16	16	2014年4月初，安徽濉溪县63岁的刘秀兰和75岁的魏秀英不慎掉进深水沟，被两名路过中学生合力救起。可两名学生连名字也没留下就悄悄离开。日前，2位老人经多方打听，才找到恩人：两人是淮北市临涣中学的王大贺和祝召奇。这些中学生的善举给小县城带来莫大的正能量。	In early April 2014, two old ladies Liu and Wei fell into a deep gutter but fortunately, they were saved by two students. The two students left after rescue without telling the old ladies their names. The two ladies asked many people and finally found these two students. They are Wang and Zhu, from Linhuang Middle School. Their kind conduct give positive energy to this country.
17	17	4月17日，河南某高校中文系系主任傅瑛教授，一个满头白发的爷爷辈老者，近日担心本系学生忙运动会没时间吃饭，忙大半夜亲自煮了600多个鸡蛋，并且因害怕大家饿着，早上七点多就开车给大家送去。任教授不是第一次亲自给学生们送鸡蛋，他一直为学生服务，默默资助着贫困的学生。	On April 17th, the head of Chinese Department in a university, Professor Fu Ying, prepared more than 600 eggs for the students joining in sports game. He was afraid that the students would be hungry, so he drove to school and sent the eggs at 7am. This is not the first time for Professor to send eggs. He continued donating money to help poor students.
18	18	2014年4月20日，四川一卡车司机行车途中发生车祸，双腿被卡住无法脱离驾驶室。看到消防官兵到场救援，他淡定点燃香烟，还给老婆打了近五分钟电话，问"如果我两腿断了你还会不会爱我，还会不会和我在一起？"或许是得到老婆肯定答复，他格外激动，又接连抽了几只香烟，期间不时向救援人员建言献策。	On April 20th, a cart diver caught an accident. His legs were locked in the cab. When the rescue was proceeding, he made a phone call to his wife. His wife promised to love him and stay with him no matter what happened. The driver was so excited. He communicated with the rescue team.
19	19	据海西晨报报道，从事早教工作的27岁男生杨一林，是厦门市第38例非亲缘关系造血干细胞捐献者。2年前，他曾为一位患白血病的3岁女童捐献骨髓，挽救了孩子的性命，可药物过敏的他却异常难受。今年3月底，女童病情复发，杨一林再次决定为她捐骨髓。	Yang Yilin was the 38th contributor who contributed his stem cells to a stranger. He donated marrow to a 3-year-old girl who suffered from leukemia two years ago, although the drugs caused an allergy and made him very uncomfortable. Unfortunately, leukemia relapsed on the girl this year, so Yang donate stem cells to her.
20	20	据武汉晚报报道，在武汉大学读大三的王悦同学，去年啃下900本书。据悉，读法律的他，读的书并不局限于法学，还包括文史哲、经济甚至工科的内容。此外，他1年还写下近6万字的读书笔记！他说，“当别人都在刷人人和微博的时候，我就在读书。”	A junior student in Wuhan Univeristy Wangyue read 900 books in the last year. He majors in law, but read more books than in law, e.g. arts, history and philosophy etc. He also has wrote notes with over 60,000 Chinese characters. He said, "I am reading when others are surfing on web."
21	21	在山东泗水县大山深处，乡村医生刘庆民干了35年也没赚到大钱。1979年开诊以来，村民欠费单据记了1880张，约9万元。即使是在2009年自己患上了膀胱癌，他也没去要账。他说:“当医生治病救人是职责，乡亲们过得不容易，愿意给就给，不给我永远不要。”	A doctor has been working in remote country for 35 years. The cumulated money in note was RMB 90, 000 yuan. Even when he suffered from carcinoma of urinary bladder, he did not press for payment of debt. He said, "It is a doctor's responsibility to rescue patients. I won't press the patients who did not pay."
22	22	日前，在葫芦岛市街头，一队60辆自行车穿着黄色荧光骑衫，伴着飘逸白色婚纱走过，这不是拍电影，这是婚礼现场的接亲队伍。双人自行车作头车接新娘，接亲车队由自行车组成。新郎王先生表示，办一场用自行车接新娘的婚礼是他一直以来的心愿，希望能以此向倡导一种低碳出行，节能环保的生活方式。	Several days ago, a team consisted of 60 persons on bike to escort a couple to weeding. The groom Mr. Wang said a green wedding is his hope. He hopes it will promote a green and low-carbon living style.
23	23	22岁的灵璧县女孩廖雅楠，带着从老家筹来的数万元又回到武汉男友祁伟身边。在此之前，廖雅楠和男友祁伟已经打算领证结婚，却意外发现男友患上了白血病。廖雅楠在医院悉心照料男友近两个月，在祁伟治疗失去信心的半个月里，她发了30多条求婚短信燃起了男友对生的希望，俩人决定共同面对今后的生活，不离不弃。	Liao Yanan and her boyfriend, Qi Wei intended to marry but unfortunately Qi Wei was found to have leukemia. Liao took care of her boyfriend in hospital for two months. And when she was back to hometown to collect money, Qi wei lost his confidence. Liao kept sending messages to Qi to make a proposal. These messages made Qi wei recovered from despair. They decided to stay with each other and overwh…
24	24	“黑夜给了我黑色的眼睛，我却用它寻找光明。”同时患有先天性白内障、先天性弱视、高度近视及眼球震颤4种疾病，被认定为二等残疾，无法上大学，找工作四处碰壁，河南24岁小伙曹小龙在武汉大学蹭课两年多，听了2500节课，并在这里收获了爱情，女友是武大的研究生。	Cao Xiaolong was 24 years old. He has poor vision and thereafter did not attend university and work. However, he kept sitting on in the classrooms of Wuhan University for two years, and attended 2,500 classes. And he met her girlfriend here, who was a postgraduate student in this university.
25	25	灰蒙蒙的下雨天，在通往徽州小学的泥巴路上，三位老人弓着背，为了给途经此处上学的孩子和行人整出一条安全的“石头路”，不停地上坡下坡搬运石头。这三个老人都是附近的退休工人。他们的忙碌成为雨帘下别样的风景。 “我们都退休了，也不想出风头，做这个事情也就是力所能及。”	Three retired workers kept moving rocks in rain to pave the road to Huizhou Primary School. They hoped there would be a safe road for students and pedestrians. They thought that was what they could do.
26	26	日前，台湾小学五年级的许姓男童骑单车载母亲外出买午餐，坐后座的母亲遭抢匪持砖块、西瓜刀攻击，还被抢走金项链。许姓男童用学来的跆拳殴打抢匪，致抢匪西瓜刀掉在地上，安全帽被扯掉致容貌曝光，警方昨天缉捕林姓嫌犯送办。“我不会害怕，只担心抢匪伤害妈妈！”身高不到150公分的男童事后这样说。	A five-grade boy Xu, struggled bravely with a robber who had attacked his mother and rob her necklace. Xu hit the robber with taekwondo and made him visible. So the police succeeded to catch the robber. Xu said he was not fearful at that moment, for he would like to protect his mother.
27	27	在重庆江津有一位老翁，今年90岁高龄，用一辈子在他家后山的6亩地种玫瑰，靠着玫瑰花瓣和玫瑰糖，他养活了全家8个子女。67年前，张万银在老丈人家，第一次看到了玫瑰花，回忆中“玫瑰花开得很漂亮“，于是他要了几十株玫瑰苗带回家，种在后山。他没想到，打理玫瑰园，会成了他漫长人生中最美妙的事。	A 90-year-old man have planted rose in the backyard of his house. By selling petal and sugar, he earned his life and brought up 8 children. He began to plant rose 67 years ago. Planting rose is the most romantic thing in his life.
28	28	英国41岁男子穆尼什•班萨尔的女儿苏珊(Suman)1996年5月16日出生，今天正好是其18岁生日。自从出生起，班萨尔几乎每天都给女儿拍照，以记录女儿成长的巨大变化。这些照片包括苏珊第一次笑、长第一颗牙、第一次学步、第一次上学等。现在，为了庆祝女儿18岁，班萨尔将这些照片拼合成苏珊的巨大肖像。	A 41-year-old man's daughter was born on May 16th, 1996. And now she is 18 years old. The man took photos every day for her daughter to make records for her. Thus, the first laugh, the first tooth, the first step and going to school were all recorded as photos. To celebrate his daughter’s 18th birthday, he will combine all these picture as a large portrait to his daughter.
29	29	“我是一只等待千年的狐……”昨日晚上九点半，陕西服装工程学院9号公寓楼前传来一阵歌声，六七名女生正站在公寓楼门外合唱。“好了，进来吧”，伴着爽朗的笑声，一位50岁左右的宿管阿姨将门打开，笑呵呵地招呼她们进去。原来阿姨规定九点以后回宿舍的同学需要唱一首歌才进门，当然，允许合唱哦。	At 9:30 pm last night, several girls sang outside the dormitory together. After hearing their song, the supervisor of dorm opened the door and let them come in. She requires the girls who come back later than 9:30 pm to sing a happy song before they are allowed to come in.
	30	“今天下午两点半，在南京大行宫站等公交车，其间一姑娘同等车，头发齐肩，穿着牛仔外套，蓝色九分裤……目测在165-170厘米之间。”前几天，来自上海的小周发了这样一篇微博，“一面之缘，让我心心念念。”结果姑娘真的看到了这篇微博，目前这位南京姑娘应邀与小周同游夫子庙。	A young man Zhou post a microblog message on his weibo account to find the girl he encountered at the bus station in front of Daxing Palace in Nanjing. Zhou writes, she wears jean jacket and she is 1.65 to 1.70 meters tall. Fortunately, the girl found this message and she would visit Fuzi temple with Zhou.

## Sheet: Negative
	Chinese Version	English Version
1	据中国驻古晋总领馆证实，在马来西亚沙巴仙本那一家海上度假村，1名中国上海女游客和1名菲律宾籍酒店员工被7名从海滩登陆的菲律宾武装人员劫持。绑匪已提出约合人民币7014万元的赎金要求。马来西亚水警已出动追踪劫持船只，并赴度假村勘察。政府也派员与中间人谈判。	One Chinese tourist and a Malaysian worker in hotel were kidnapped by 7 Philippinese in the shore near the hotel. The kidnappers asked for RMB 7,014 yuan as random money. The Malaysian police has begun to trace the kidnappers and also negotiated with them.
2	在侵华期间，日本曾两度在浙江丽水实施细菌战。据丽水市档案局的统计结果,共有15764名受害者，到今年3月，在世者只剩142人。浙江贺村镇幸福村村民姜高达去年年底去世，85岁的他双腿溃烂了70年。他的儿子说,父亲是"逃日本兵”时染上这种怪病的，有生之年一直饱受病痛的折磨。	In Lishui, a city in Zhejiang, there were 15,764 victims of Japanese' bacteriological warfare. Only 142 of them are still alive. One victim, Gao Da, had suffered from fester in his feet over 70 years until his death.
3	2014年4月兰州市出现了较为严重的自来水污染事件。10日兰州市威立雅水务集团公司检测显示，当日 17时出厂水苯含量高达118微克/升，11日凌晨2时检测值为200微克/升，均远超出国家限值的10微克/升。苯超标对人体有潜在的致癌作用。当地环保局已介入调查。	In April, there was a large contamination in fresh water happening in Lanzhou. On 10th, each vol of water contain 118 mg benzene, and this increased to 200 mg in the next morning. The permitted benzene in each vol is 10 mg. The excessive benzene may induce cancer.
4	日前，海南省一学校未上报任何主管部门，就擅自租用14辆大巴车组织586名学生到文昌春游。上午11时许，其中一辆大巴车行经文昌市东阁镇宝芳路段时发生侧翻，造成8名小学生死亡，32人受伤。事故后，7名责任人被刑拘，包括涉嫌安全生产事故责任的校长潘敏。	A primary school rented 14 bus to take all 586 students to trip. Unluckily, one bus rolled over, making 8 students die and 32 students wounded. After this accident, seven persons, including the principle were arrested.
5	昆明3家生产米线的作坊为了让产品够筋道白净，明目张胆地在生产过程中非法添加了增白剂、焦亚硫酸钠等添加剂。有关部门对这3家黑作坊生产的产品等进行了抽样送检，发现这些米线中含有二氧化硫残留，质检不合格。突击查处发现生产车间的环境相当脏乱差，并当场查获了焦亚硫酸钠等4种添加剂和包装袋。	Three factories in Kunming, in order to improve the appearance of noodle, appended brightener, sodium metabisulfite etc. to noodle. Their products were found to have the remains of SO2. Besides, the factories were all dirty.
6	2014年5月19日上午，江苏沭阳南关医院一名24岁男医生刘永胜刚走出办公室，就遭到三名男子袭击。致后脑颅骨骨折，颅脑浮肿，现尚未脱离生命危险。事发原因是因为这名男医生随女同事查房，引起病人丈夫对其男医生身份的不满。打人者目前已被刑拘。	On May 19th, a doctor was attacked when he was going out of the office. His skull was fracture, inducing brain edema. He was still in danger. The attacker has been arrested.
7	近日，有报道称多款洗发水经检测后发现含有可致皮肤过敏的防腐剂。其中清扬飘柔洗发水防腐剂含量较高，易致皮肤过敏。而在多数洗发水产品外包装中，的确标注产品含有该种物质。南京大学化学化工学院教授表示，这种物质含量过高可能导致皮肤过敏。	It was found to contain excessive preservative in some hair shampoo, which might induce user's allergy. This preservative was not a healthy additive.
8	近日，墨西哥有一5岁幼童因偷吃饼干，被母亲烧伤双手。据当地警察局局长称，这名孩子的姥姥在看望自己的孙子时，发现孩子的双手被严重烧伤，询问后才知道，竟然是孩子的母亲为了惩罚他偷吃饼干而做出如此狠心的行为。目前，该被虐待儿童已经住进受家庭暴力危害的儿童的监管所内。	One boy in Mexico, was burned by his mother because he ate some biscuits without his mother's allowance. His grandma found this bad conduct and reported. This boy has been protected in children shelter.
9	日前，景山实验学校老师李某因涉嫌猥亵至少两名女生，被警方刑事拘留。据悉，该校12岁女学生小琪一个多月以来频繁遭到50来岁的男班主任李某的猥亵，在对方的多次威逼利诱后，她再也不敢回到学校。同班13岁的小陆，也有相同遭遇。目前此案正在进一步调查中。	One teacher in a primary school, was arrested for his obscene behavior. Two 12-year-old girls have been offended for one month. They were afraid of school life.
10	2014年5月23日九点半左右，深圳地铁龙华站华润万家附近发生一男子（吴某，湖北人）挟持人质事件。歹徒在砍伤一名女售货员后，又挟持了另外两名售货员，所用凶器为一把不锈钢菜刀。嫌疑人和警方对峙了两个多小时，期间没有提出任何诉求。最后警方成功擒获歹徒，人质安全解救。	A man kidnapped three salesclerks with knife at a subway station. He even chopped one of them. He confronted with policemen for two hours. Finally, he was caught and the hostages were all rescued.
11	据京华时报报道，山东平度村民刘天基等村民到国土厅要求公开征地红线图未果，平度政府部门人员要带村民回平度，刘担心自身安全，于是躲至章丘但仍被找到。在其被村委及政府人员从章丘带回的路上，遭村支书刘大伟殴打致左耳失聪。警方称已控制支书刘大伟。	According to the report of Beijing Times, some villagers in Shandong were attacked after they came to Land and resource bureau to require to publish the planning map. Their requirement was refused. On their way home, one villager Liu's ear was hurt by Liu. Liu has now been arrested.
12	“我就是想找她要点钱，买三轮车摆个烤鱿鱼摊，挣钱养活自己。“崔志星26岁，去年9月来郑州打工。今年崔志星想开一个烤鱿鱼的摊位，但他手中缺钱。前日晚上11时许，崔志星尾随单身女子曹女士进入一ATM机操作间，然后把弹簧刀架在了曹女士的脖子上。曹女士取了2300元给他，随后报警。	Cui would like to open a stall to sell toasted sleeve-fishes but he had not enough money. So he followed a single women Cao before an ATM and put a knife on Cao' neck. Cao gave him RMB 2,300 and later called the police.
13	2014年5月17日，南京一名老人骑电动车撞了行人李某，行人无大碍。但老人倒地后一动不动，行人李某吓得跑掉。老人被好心路人送往医院，但经抢救无效死亡。近日李某涉嫌交通肇事罪被刑拘。交警称，李某横跨禁止通行的中央绿岛并横穿机动车道，属违法行为。	On May 17th 2014, an old man driving an electro bicycle was collided down by a pedestrian. The pedestrian was not hurt but the old man was badly hurt. The pedestrian was fearful and fled. The old man died after he had been to hospital. The pedestrian was arrested because he walked across the driving road, which is not allowed.
14	2014年5月24日，一名武汉城管协管员在规劝小贩勿占道经营时，遭一卖水果小贩持刀砍伤。目击者称，小贩与协管员争吵，用水果刀砍伤对方后，朝附近苗圃方向跑去。医生介绍，伤者被砍三刀，额头的伤口长约5厘米，深可见骨；后颈部伤口长达10厘米，头顶也有一刀。	On May 24th 2014, an officer of chengguan was chopped by a packman selling watermelon. It was seen that the packman quarreled with the officer. He fled after choking. The officer was chopped three times, some wound was deep in neck and head.
15	40岁的何某，多次到一家游戏厅玩电子游戏，渐渐迷上了游戏赌博。前日中午，何某决定用所剩无几的存款再去博一博。他提着装有两个饮料瓶的红色塑料袋来到游戏厅，结果再次连续输钱。于是何某先拿出饮料瓶往游戏机上泼洒汽油，然后往自己身上浇，结果游戏厅被烧毁，何某目前生命垂危。	One man burned the shop of recreation house for electronic game he always visited in the past. He lost all his money here. He poured petrol around the house and on himself. The house was destroyed and he was also critically burned.
16	一声枪响打破了茶城普洱的宁静，几辆豪车围在普洱市职业教育中心大门口，10余名男子与保安的冲突在一个小时内上升为与警方的冲突。有目击者称，大批警力与对方僵持，对方人员企图抢警察的枪未果后，民警朝天开了一枪示警；冲突中有人放出狠话：“我爹是支队长，你们打我的人都要死！”	Several guys conflicted with police and security guard in Dali. Some of them even intended to rob the police's gun. In order to warn them, the police fired a warning shot.
17	为使加工后的鸡架色泽鲜艳、不易腐烂，莱西一黑作坊竟然在鸡架加工过程中，肆意添加大量对人体有害的工业亚硝酸钠、日落黄等有毒物质，最多时一天加工两吨毒鸡架，一年用掉四百斤亚硝酸钠。日前，莱西法院以涉嫌生产、销售有毒有害食品罪，依法判处黑作坊老板陈某等7人有期徒刑六个月至一年不等。	In order to make the chicken maintain the well-shape and colour in a longer time, a factory added many harmful materials when the processing the product. They used 200 kg nitrite, which would do great harm to human body. The boss and workers of this factory have been arrested and pronounced sentences from six months to one year.
18	前日凌晨4点半，丰泽区少林路柑舍头，16岁少女小庄，突遭一男子抢包，她奋力抵抗，拉扯中突然杀出另一男子，挎包终被抢走，她这才发现两手已被砍4刀。小庄告诉记者，被抢走的挎包内，只有一部低端手机，并无其他值钱财物。警方提醒，遭遇抢劫应冷静应对，避免受到人身伤害才是首要目标。	A girl was robbed by two men and her two hands were chopped four times. There is only one cheap mobile phone in the bag robbed.
19	北京市第二实验小学附近，学区房不少都是老旧的平房，但价格已被炒到每平方米近30万元，但是依旧房源稀缺。一个不足10平方米的单间，比卫生间大不了多少，要价税后实收300万元，不还价。尽管价格高得离谱，但中介仍表示：不是一房难求，甚至一平难求，有钱也没有足够的房源。	The price of many apartments near the famous primary schools has increased dramatically. Though the price of each square was nearly RMB 300,000, they are still scarce. A small room without toilet costs RMB 3 million yuan. The agency said customers may fail to buy an apartment even though you have enough money.
20	南昌新建县检察院近日对5名不法商贩以涉嫌生产、销售有毒、有害食品罪依法提起公诉。为让馄饨和饺子有嚼劲，他们竟向饺子皮、馄饨皮中掺入硼砂。硼砂是一种无色结晶物质,多用于化工行业。在对动物的实验中,硼砂具有致癌性。人体如果摄入硼砂,出现食欲减退、腹泻和呕吐反应，严重者可致死亡。	Some factories added sodium borate to dumpling and wonton in order to make them tastier. Sodium borate has been demonstrated as a harmful material in human experiment. It will even cause cancer. The owners of these factories have been arrested and prosecuted.
21	据台媒道，台湾李姓妇人酒后不满中风的吕姓母亲唠叨，情绪失控持空热水瓶猛击母亲头部伤重死亡，伴尸四个半小时后自首。一审审酌她自首，且犯后态度良好，酌减量刑，依杀害直系血亲尊亲属罪判她16年徒刑。全案上诉后，台湾高等法院21日驳回上诉，维持原判。	A woman living in Taiwan stroke her mother's head after she drank. The woman was impatient with her mother's words and out of control after drinking. Her mother was dead and she surrendered herself to the police four hours later. She was pronounced as sentence of 16 years.
22	据新华社报道日前，浙江苍南灵溪镇城管与民众发生冲突被围。苍南城管局法制科何科长说，当时有5人被围。从上午事发到下午警方劝离群众，5人遭围殴时间较长，其中两人休克。据介绍，这5名工作人员并不是正式员工，他们是城管临时叫来搬运占道物品的。	Some temporary worker of Chengguan in Zhejiang conflicted with the masses, and five of them were attacked. Two were shock.
23	据新华网报道，一笔扶贫款从市到县被侵吞40％，从县到乡又被克扣40％；一张小农机具秧盘的国家补贴2毛5分，农技站就克扣1毛8分，站长还要贪3分；一个售价数百元的骨灰盒，民政干部也要拿15元回扣。现今 “清水衙门”已经成了腐败“重灾区”，腐败行为严重侵害着基层群众的利益。	It is reported that some basic government and institution have been corrupt. They extracted the profits, increasing the price of product and embezzled allowance.
24	日前，中共中央纪委对湖北省原副省长郭有明严重违纪违法问题进行了立案检查。经查，郭有明利用职务上的便利为他人谋取利益，本人或通过其特定关系人收受巨额贿赂；利用职务上的便利为他人谋取利益，其亲属收受巨额钱物；道德败坏。据不完全统计，这是中共十八大以来被打倒的第13位省部级贪腐“老虎”。	The vice-governor of Hubei Province Guo Youming has been arrested because of his corruption. He received bride from some people and make profit to them. He is the 13th governor arrested because of corruption after the 18th congress.
25	日前，中国科协党组书记、副主席、书记处第一书记申维辰因涉嫌严重违纪违法，已被免去领导职务，现正在按程序处理。申是今年以来第6位被调查的省部级官员。申在太原任职期间，曾发生不少未批先建、超规划建设、集体土地违规开发、开发商卷款潜逃、拆迁命案等问题，引发各类大规模群体性维权事件多起。	The head of China Science Committee was arrested because of some issues. He is the sixth governor arrested in this year. He is the former mayor of Taiyuan, where many bad cases happened.
26	日前，新华社《经济参考报》的记者王文志 ，再次实名举报华润集团董事长宋林，称其包养情妇和腐败，并表示所有的举报内容，均有证据支持。宋林则否认，称王是造谣，并称要起诉对方。但中纪委网站最新发布消息：华润集团董事长宋林，因涉嫌严重违纪违法，正被中纪委调查。	A journalist in Economic Information Daily Wang informed the chairman of Huarun group Song was corrupt. And his declaration was supportive. Song denied and said he would prosecute Wang. However, Song now is arrested.
27	日前，武汉市政府应急办发布消息称，汉江武汉段水质出现氨氮超标，受此影响，当晚汉江武汉段两大水厂均已紧急停产，全市260平方公里面积停止供水，30多万居民、数百家食品加工企业用水受影响。湖北省环保厅、武汉市环保局正在排查污染源。	Wuhan government pronounce that the water in Han River and Yangtze River has been polluted. The water supply has been stopped. Over 300, 000 residences and factories were affected. The bureau of environment protection were looking for the source of pollution.
28	日本文部科学省在2014年4月4日公布了明年启用的小学教科书审定结果。出版社会课教材的共有5家公司，其中3家在5年级或6年级的教材中，首次把钓鱼岛表述为“日本固有领土”。部分教科书上也有提及“中国公务船频繁入侵日本领海”。中国已对此事表示抗议。	MEXT pronounce the result of examination to the textbooks in primary school on April 4th, 2014. There are five presses publishing these textbooks. Three of them declared Diaoyu island was the inherent territory of Japan. China has protested to this statement.
29	昨天26岁温州籍女青年黄某，陈尸意大利普拉托的家中。开始其男友在调查人员面前很镇定，并未显示出女朋友被害的悲哀情绪，引起办案人员高度怀疑。在接下来的审讯中，其男友所述的版本漏洞百出，。次日凌晨1时许，其男友承认是他因为向女友索要分手费不成掐死了黄某。	A young Chinese women was found dead in her home in Italy. Her boyfriend was suspected as murderer because his smooth emotion and leaky words. He finally acknowledged that he took his girlfriend by the throat because he failed to get money from her.
30	河北籍曹小姐与雷某同居，生下一个儿子，由于雷某对其经常打骂，于一年前分手，曹小姐回到河北老家。雷某却无法放下，据其朋友称雷某一直希望和好，上个月雷某从广东跑到河北，在曹小姐下班的路口等她，希望能够和好，但是遭到曹小姐拒绝，雷某掏出刀当街杀死了曹小姐。	A woman parted with his boyfriend and the father of her son because he often maltreated her. She came back to hometown but unfortunately was killed on her way home by her ex-boyfriend after she refused to make it up with him.

## Sheet: Neutral
	Chinese Version	English Version
1	国务院办公厅4月1日印发《2014年政府信息公开工作要点》。《要点》要求加大“三公”经费公开力度，所有财政拨款安排的“三公”经费都要详细公开。同时，相关单位要及时、全面、准确公开整改情况，进一步提升财政预算执行和收支审计工作情况的透明度。	General Office of the State Council published "the key points of government work in 2014". This document require budget and expenditure can be seen by public. All expenditures need to be shown in detail. And the government need to expose these information on time and correctly.
2	2014年4月1日上午，即将结束访欧行程的习近平主席在菲利普国王夫妇陪同下，参观了比利时最大的汽车生产企业——沃尔沃根特工厂。习近平主席认真地观看展品，不时询问生产情况。之后企业负责人把一个手工制造的“中国红”汽车模型赠给习近平。	President Xi Jinping visited the largest car factory in Belgium, being accompanied by the King and Queen of Belgium. President Xi looked at the car models and ask about its production. He received a present, a hand-made model of "red-flag" car.
3	国务院总理李克强4月8日下午在三亚同老挝总理通邢举行会谈。双方就推进中老全面战略合作伙伴关系达成新的共识，共同宣布启动中老政府间铁路协议商谈，争取尽早签署，促进区域互联互通和共同发展。会谈后，两国总理共同见证了双边金融等领域合作文件的签署。	The Chinese Prime Minster, Li Keqiang talked with the Laotian Prime Minster on the afternoon of April 8th. They have new consensus in promoting bilateral relationship and announced the agreement of building international railway would be established soon. After the talk, they signed some documents announcing bilateral cooperation.
4	近日，“好奇”号探测器从火星上发回的最新照片中出现一抹神秘的亮光，引发外界热议。从照片上看，这是一个白色的“亮点”。美国国家航空航天局回应，这处亮光可能是受到阳光照射而闪烁了的岩石，或者是宇宙射线打在相机上而产生的噪点。	The Mars explorer, "curiosity", send new pictures showing a new mysterious light. NASA explained that this light might come from the rock shined by sun shine or come from the noise induced by cosmic rays.
5	近日，美国昆尼皮亚克大学进行了一次“模拟民调测试”，旨在测试民众对政客种种不端行为的包容程度。测试结果显示，相比“婚外情”，民众更难以接受“滥用职权”和“伪善”。《华盛顿邮报》称，如果一名政客承诺了他根本做不到的事情，支持率恐怕会降至冰点。	A survey to explore public's tolerance to the bad conduct of politians showed that compared to extramarital relation, abuse of power and hypocrite were more unacceptable. Washington Post says if a politian promises a task that he can't not fulfill will greatly destroy his public supports.
6	江西南昌大学3月中旬起开始在7个学院的学生宿舍试点取消专业保洁，由大学生负责自主保洁，各学院将原本发放给保洁员的工资转而发放给承包楼道卫生的同学用于勤工俭学或班集体用于班费。据校方介绍，自主保洁模式将在今年9月份在全校本科生宿舍推行。	The officers in Nanchang University have decided to stop the clearing service in students' dormitory. The wages to the cleaners would be paid to the students who are responsible for clearing the public areas. This new procedure will start in September this year.
7	近日，据现代快报报道，吉林大学考古专家朱泓经2年调查发现，古代中原地区的汉族人的特征为“低面、阔鼻、低眶”，与现今汉族体质特征差异较大。他认为，正统汉人应是从宋代开始进入“混血”状态，经过其他民族血统融入，才成为今天的样子。	Professor Zhu, an archaeologist in Jilin University found that the ancient people living in middle China were different from the modern people in this area. He proposed modern people living in China was the common offspring of ancient Han ethnic and other ethnic groups after Song Dynasty.
8	4月18日，北京市公布2014年小升初政策，实行单校划片或多校划片的免试就近入学，全市首次采用统一的小学和初中入学服务系统，实施计划管理。非本市户籍儿童入学要提供“五证”：家长就业证明、居住证明、全家户口簿、在京暂住证、户籍所在地无监护条件证明。	Beijing Government announced the policy of entrance to middle school. The primary graduates will go to middle schools near their primary schools. The student who are not recognized as residents in Beijing are required to submit the following documents: the certificate from their parents company, the living certificate, the temporary residence permit, and the certificate of not living at hometown.
9	在非洲埃塞尔比亚纳基尔沙漠内的阿法尔三角地，如今仍存在着类似我国古代“茶马古道”的“盐路”。数百年来，当地人们徒手掘盐，并用骆驼向沙漠之外运盐，以换取金钱与部分生活用品。阿法尔三角地面崎岖、温度极高，年均温达50°C。对许多非洲国家而言，盐这一人类所需的主要矿物均产于此。	In the alpha triangle in Africa, there is a tea-horse road. From hundreds of years ago, local people dig salt by hand, and sell sale to outsides the desert by camels. They earn money and living materials through this way. This area is the main place of producing salt.
10	日前，中国联通与贵州茅台酒厂有限责任公司签订视频监控项目合作协议。根据协议，中国联通投资建设覆盖茅台集团全国约300家专卖店的广域网络系统、视频监控系统及多媒体信息发布系统。该项目合同时长5年，是近年来中国联通与茅台集团最大的集团业务合作项目。	China Unicom and Maotai Wine factory has signed an agreement for video surveillance. China Unicom will help to build up surveillance network and publication system for over 300 branch shops of Maotai Wine. This cooperation project will last for 5 years.
11	2011年12月俄罗斯和叙利亚签署了首批6架雅克-130 供应合同，叙利亚向俄罗斯划拨了约1亿美元的预付款。5月5日报道，俄罗斯计划在2014年底前把第一批雅克-130教练机交付叙利亚，接下来两年将分别获得12架和15架飞机，俄由此将履行此前签署的36架雅克-130飞机的合同。	In Dec. 2012, Russia and Syria signed a contact on first Jacques-130 airplane. Syria paid 100 million dollars in advance. Russia intended to send Jacques-130 coach airplane to Syria in the end of 2014, according to the report on May 5th. In the following two years, another 12 and 15 will be sent respectively.
12	2014年4月10日上午，李克强总理在博鳌亚洲坛发表主旨演讲。他强调，南海和平稳定符合包括中国在内的周边国家的共同利益，中方愿在《南海各方行为宣言》框架下，稳妥推进“南海行为准则”磋商进程，共同维护南海的和平稳定和航行自由。中国愿与地区各国共同致力于建设和平、繁荣和开放的亚洲。	On the morning of April 10th, 2014, Premier Li Keqiang made a keynote speech in Boao Forum of Asia. He emphasized that the peace of South China Sea would bring common right to all surrounding countries. China is willing to promote the agreement of "Rule of conduct in South China Sea", and protect the peace and security of sailing in South China Sea in the framework of "Announcement in South China…
13	2014年美国普利策奖获奖名单4月14日在纽约揭晓，《华盛顿邮报》和《卫报美国》因报道斯诺登泄露美国国家安全局监控计划并列获得分量最重的公共服务奖。斯诺登对《华盛顿邮报》和《卫报美国》获奖表示祝贺，称获奖是对“所有相信公众需要在政府中发挥作用的人的辩护”。	Pulizer 2014 was announced in New York on April 14th. Washington Post and The guardian US were prized equally for the most important public service award because the publication about Snowdon who leaked NAS's monitoring project. Snowdon congratulated their awards and stated this award is a justification to all who believe public should take part in government administration.
14	4月17日，缙云山国家级自然保护区管理局职工王志平巡山途中，发现一条方形蛇，经重庆自然博物馆黄永昭、西师附中罗键等两栖爬行动物专家鉴定，该物种为脆蛇蜥，像黄鳝又像蛇。5月4日，重庆市林业局透露，这是蛇蜥首次被发现，该物种被《中国濒危动物红皮书等级》列为濒危保护等级。	On April 17th, A square-shaped snake was found by the officer of Administration Bureau of Jin Yun State Conservation Area. Two specialists confirmed this is special type of lizard. On May 4th, the officer of Forestry Bureau said this was the first time that this type of lizard was found. It has been listed as the animals which have been in imminent danger.
15	4月22日，全国房地产经理人联盟副秘书长陈宝存撰文写道：最早的环渤海地区发展规划是包括北京、天津两大直辖市及辽宁、河北、山西、山东和内蒙古中部地区的，共五省（区）二市。所以有观点认为，推动京津冀一体化，提升与带动环渤海地区发展，是北方区域发展提速的必然保障。	On April 22nd, Secretary general of real estate wrote: circum-Bohai area includes five provinces and two cities: Beijing, Tianjin, Liaoning, Hebei, Shanxi, Shandong and middle part of inner Mongolia. The unity of these areas would promote development of these areas, serving as the guarantee of accelerating the local development of North China.
16	4月25日报道，马英九于当日邀请民进党主席苏贞昌进行历史性“马苏会”。为表达善意，4月24日“府”、“院”、党核四决策作出重大转折；知情人士表示，执政党等于是以“立法”与行政力量，做出“封存核四”的决议，这是马英九当局的高度诚意。	On April 25th, Ma invited Su to have an historical meeting. In order to show Ma's sincerity, the proposal of the forth nuclear power would be suspended.
17	4月29日报道，兼任国民党主席的台湾地区领导人马英九启动接班计划，将提名新北市长朱立伦、台中市长胡志强、台北市长郝龙斌为国民党副主席，送30日中常会备查。国民党高层人士透露这项消息，现任副主席林丰正、詹春柏、蒋孝严将主动请辞。	According to report on April 29th, the president of KMT, Ma would nominate the mayor of Xinbei Zhu, the mayor of Taizhong Hu, the mayor of Taipei Hao as the vice-presidents of KMT. The present vice-presidents would resign.
18	5月1日，原中共中央政治局常委、国务院副总理李岚清，在陕西师范大学进行了一场“大众篆刻与保卫汉字”的讲座。李岚清，1952年9月加入中国共产党并参加工作。中共第十三届中央候补委员，中共第十四届中央委员、中央政治局委员，中共第十五届中央委员、中央政治局委员、常委。	On May 1st, former member of the standing committee of the political bureau of the Communist Party of China a talk to university students a talk about "seal cutting and Chinese character".
19	5月4日，由潍柴动力配备发动机的第60万台福田重卡下线，背书了两家的合作。根据协议，未来双方将利用各自领先的技术联合开发国Ⅴ、国Ⅵ排放标准的重卡产品，改善生态环境的企业责任也包含在双方的合作中。两家的合作不仅对两个企业的发展产生了重大影响，对行业的发展也具有重要意义。	Until May 4th, Weichai Energy has produced 600,000 engines for Futian Cart. According to their agreement, both parties would develop products that meets V and six emission standards. The requirement of improving ecological environment is also included in this agreement. This cooperation would exert great effect not only on these two factories, but also on the whole business.
20	5月4日清晨，福建漳州渔民张添发跟搭档摇着小船到九龙江北引闸内钓鱼。6时许，他轻拉鱼线时，鱼竿尾部抖了一下。两小时的拉锯战后，张添发小心地把这条硕大的鱼拉出水面，用抄网捞上船，一看是野生淡水鲈鱼。去年12月，本报曾报道渔民在附近水域钓到24.8斤的鲈鱼，而这一次的鲈鱼，达到26.8斤。	On May 4th, a fishman Zhang fish on Jiulong River with his partner. He spent 2 hours in pulling a big fish out of water. It was a weever living in fresh water. It weighed 13.4 kg.
21	5月5日早上9点半开始，西藏拉萨出现日晕奇观，太阳被彩色的光环环绕着，景象非常壮观。日晕形成的原因是高空中出现了由冰晶构成的卷层云。卷层云中的冰晶经过太阳照射，发生折射和反射等物理变化，最终太阳周围就出现一个巨大的彩色光环。	On May 5th, a solar halo happened in Lasha at around 9:30 am. It looked wonderful. Solar halo happens because cirrostratus appeared in high altitude. Ice crystal in cirrostratus reflects and refracts sunshine, producing a colorful circle surrounding the sun.
22	医疗体制对医生职业的扭曲背后，也蕴藏着医生创业的空间——譬如，让真正的医生职业化。与牙科诊所等靠器材赚钱的，类似体制内医疗的生意路径不同，让儿科、内科等大科医生恢复职业的本原面貌并投入市场，更能迅速填补中国城市日趋失衡的医疗供求。	Recently, a new route for Chinese doctors appeared. Instead of making profits from selling drugs and applying machines, the doctors in department of pediatrics and department of physics come to the community, which would compensate and meet the largest medial requirement in China nowadays.
23	历经4次审议，环保法修订案于2014年4月24日经十二届全国人大常委会第八次会议表决通过，明年1月1日施行。其中，修订案进一步明确了政府对环境保护的监督管理职责，首次将生态保护红线写入法律。新环保法还着手加大惩罚力度，对污染企业按日连续计罚，罚款将上不封顶。	After forr deliberation, revision of law of environment protection passed in the 8th meeting of the standing committee of NPC on April 24th, 2014. This revision confirms the rule and responsibility of government on the supervision and monitoring. It will also exert more punishment to the enterprise which polluted environment, without any upper limit.
24	国务院总理李克强2014年4月10日下午在海南博鳌会见来华出席博鳌亚洲论坛2014年年会的巴基斯坦总理谢里夫。李克强指出，当前中巴关系不断取得新进展。双方一致同意以中巴经济走廊建设作为两国务实合作的重心，全面提升两国各领域务实合作，这有助于打造“中巴命运共同体”。	Premier Li Keqiang met the Premier of Pskistan who came to attend Boao forum of Asia on April 10th, 2014. Li proposed that there has been many new developments in the relationship between our two countries. Both parties agree to build up a common economic corridor, promoting the cooperation between two countries.
25	在马术比赛中，场地障碍赛最标准的障碍数量是“12道15跳”，也就是12道障碍，骑手需要完成15跳，其中包括一个三连跳“ABC”和一个二连跳“AB”。马术比赛的规则不像其他赛事那样严格不变，有时候也会有10道障碍的比赛，或者两个“AB”二连跳的比赛。	In equestrianism jumping, there are 12 barriers, over which athletes need to make 15 jumps, including an "ABC" triple jump and "AB" double jump. The rule of equestrianism is not as strict as other matches. Sometime, there are matches which set 10 barriers or require athletes to finish two successive double jumps.
26	庆祝朝鲜松涛园国际少年团夏令营竣工的文体活动近日举行，朝鲜最高领导人金正恩出席并观看此间举办的足球比赛。据报道，朝鲜全国少年足球大赛决赛在松涛园露天操场进行。比赛结束后，金正恩向选手和观众挥手，并同两队球员、教练和裁判一一握手，与他们合影。	The head of North Korea, Kim Jong-il watched a football match help in the camp for juvenile. The final match will be held in the same place. After the match, he waved his hand to the players and audience. He also shook hands with the player, coach of the two teams and judges, and took photographs.
27	斯柯达汽车董事会主席范安德对外表达了斯柯达在中国市场从大众品牌中独立的愿望。事实上，自从范安德转任斯柯达全球掌门人之后，就一直主张斯柯达要在中国市场进行“品牌独立”。而考虑到现阶段斯柯达在中国发展的现状，以及上海大众架构体系的管理， “独立”前景似乎并不被业内人士所看好。	The head of Committee of Skoda expressed their hope to be apart from Volkswagen and stand alone in China. After he became the head, he proposed that Skoda needs to "stand also". Considering the current development of Skoda and the administration system of Volkswagen, this proposal is not optimistic.
28	西部证券认为，5月市场将继续受制于自身的弱势趋势、高估值个股风险释放、经济基本面下行和IPO重启等不利因素，弱势筑底行情仍将延续。从市场风格来看，短期经济波动对权重周期股的负面影响更多一些；而风险溢价的影响对小市值影响更大。在操作上，继续保持多看少动，控制仓位，等待市场企稳态势。	In May, the stock market would be affected by its weak situation, risk of some stock, poor condition of economics and the restart of IPO. It would maintain at low level for some time. The fluctuation of economics in the short term would exert more negative effect. So investors need to be conservative and wait.
29	讨论中国经济的结构问题时，大多数人认为中国的投资率偏高，消费率偏低，应从“投资拉动”转为“消费驱动”。但近年来，一部分经济学家认为，中国的消费率统计被低估，投资率统计被高估，中国不应抛弃重投资的路线，“重消费轻投资”不是正确方向。	It is usually considered that the rate of investment is high but the rate of consumption is low in China. However, some economists thought the rate of consumption is underestimated and the rate of investment is overestimated. China should continue the priority of investment. "More in consumption and fewer in investment" is not correct.
30	近期，保利地产在北京正式对外公布的公司长期养老战略规划，成为这一央企地产巨头全产业链涉足养老产业的路线图。董事长宋广菊透露，目前已在北京、上海以及广州等5个城市，布局有6个在建试点项目，从机构养老、社区养老以及居家养老 “三位一体”推进，全产业链切入。	Poly real estate announced their strategies on the service for old aged. The chairman said they had launched some projects in Beijing, shanghai and Guangzhou etc., to promote service from institution, community and family.
